# Supplementary material for: Altered differentiation of endometrial mesenchymal stromal fibroblasts is associated with endometriosis susceptibility
Source: PubMed Central journal article supplement (PMC9209414; doi:10.1038/s42003-022-03541-3), 2022-06-20
Supplement: 42003_2022_3541_MOESM3_ESM.pdf [file 42003_2022_3541_MOESM3_ESM.pdf]

## Description of Additional Supplementary Files

**File name:** Supplementary Data 1

**Description:** Differential gene expression analysis between Cluster 0 and all other cells.

**File name:** Supplementary Data 2

**Description:** Differential gene expression analysis between Cluster 1 and all other cells.

**File name:** Supplementary Data 3

**Description:** Differential gene expression analysis in cells from cluster 2 to all other cells.

**File name:** Supplementary Data 4

**Description:** Significantly different gene expression between cluster 0 and cluster 1.

**File name:** Supplementary Data 5

**Description:** Significantly different gene expression between cluster 1 and cluster 2.

**File name:** Supplementary Data 6

**Description:** Significantly different gene expression between cluster 0 and cluster 2.
